# Supplementary material
Source: MDPI journal article supplement (https://www.mdpi.com/2071-1050/14/11/6551)
Supplement: s1 [file s1]

**Table S1.** Hydrogeochemical components.

| Water Sample Category                                                | Serial Number      | Hydrochemical Composition (mg/L) |           |                               |                               |                 |                                 |                  |                  |                              |
|----------------------------------------------------------------------|--------------------|----------------------------------|-----------|-------------------------------|-------------------------------|-----------------|---------------------------------|------------------|------------------|------------------------------|
|                                                                      |                    | PH                               | TDS       | HCO <sub>3</sub> <sup>-</sup> | SO <sub>4</sub> <sup>2-</sup> | Cl <sup>-</sup> | K <sup>+</sup> +Na <sup>+</sup> | Ca <sup>2+</sup> | Mg <sup>2+</sup> | NO <sub>3</sub> <sup>-</sup> |
| Quaternary pore water (P)                                            | P1                 | 7.70                             | 276.54    | 178.24                        | 13.58                         | 4.48            | 17.32                           | 43.50            | 7.08             | 12.00                        |
|                                                                      | P2                 | 7.60                             | 275.51    | 174.53                        | 11.94                         | 3.48            | 13.02                           | 49.50            | 2.96             | 20.00                        |
| Fissure water of Middle Jurassic Zhiluo Formation (J <sub>2z</sub> ) | J <sub>2z</sub> 1  | 8.38                             | 287.92    | 201.40                        | 7.20                          | 7.10            | 21.80                           | 38.10            | 9.70             | 2.50                         |
|                                                                      | J <sub>2z</sub> 2  | 8.38                             | 249.49    | 161.70                        | 9.60                          | 7.10            | 10.60                           | 43.10            | 7.30             | 9.96                         |
|                                                                      | J <sub>2z</sub> 3  | 8.11                             | 258.86    | 155.60                        | 4.80                          | 7.10            | 15.40                           | 44.70            | 4.50             | 26.58                        |
|                                                                      | J <sub>2z</sub> 4  | 8.16                             | 417.58    | 158.60                        | 114.30                        | 7.10            | 63.90                           | 42.10            | 5.80             | 25.55                        |
|                                                                      | J <sub>2z</sub> 5  | 8.14                             | 278.93    | 173.90                        | 1.00                          | 7.10            | 12.70                           | 50.10            | 5.50             | 28.49                        |
|                                                                      | J <sub>2z</sub> 6  | 8.43                             | 224.87    | 128.10                        | 13.40                         | 7.10            | 11.10                           | 40.90            | 4.40             | 19.56                        |
|                                                                      | J <sub>2z</sub> 7  | 8.30                             | 231.16    | 134.00                        | 18.30                         | 7.10            | 13.80                           | 38.10            | 6.10             | 13.60                        |
|                                                                      | J <sub>2z</sub> 8  | 8.31                             | 198.27    | 97.60                         | 14.40                         | 7.10            | 11.20                           | 52.10            | 2.40             | 13.32                        |
|                                                                      | J <sub>2z</sub> 9  | 8.07                             | 258.53    | 164.70                        | 16.30                         | 7.10            | 10.50                           | 44.10            | 8.50             | 7.16                         |
|                                                                      | J <sub>2z</sub> 10 | 8.21                             | 325.40    | 213.60                        | 14.40                         | 14.20           | 28.90                           | 36.10            | 14.60            | 3.40                         |
|                                                                      | J <sub>2z</sub> 11 | 8.10                             | 229.36    | 128.10                        | 16.30                         | 7.10            | 10.20                           | 38.90            | 7.30             | 21.31                        |
|                                                                      | J <sub>2z</sub> 12 | 8.20                             | 254.98    | 146.40                        | 25.90                         | 7.10            | 13.80                           | 40.10            | 9.00             | 12.54                        |
|                                                                      | J <sub>2z</sub> 13 | 8.36                             | 279.38    | 152.50                        | 32.70                         | 7.10            | 16.70                           | 42.90            | 9.70             | 17.65                        |
|                                                                      | J <sub>2z</sub> 14 | 7.94                             | 286.77    | 164.70                        | 12.50                         | 14.20           | 14.80                           | 48.10            | 8.50             | 23.84                        |
|                                                                      | J <sub>2z</sub> 15 | 8.35                             | 229.65    | 146.40                        | 9.60                          | 3.50            | 9.00                            | 40.10            | 6.60             | 14.32                        |
|                                                                      | J <sub>2z</sub> 16 | 8.25                             | 295.20    | 174.88                        | 17.50                         | 17.47           | 21.07                           | 40.04            | 12.14            | 12.00                        |
| Fissure water of Middle Jurassic Yan'an Formation (J <sub>2y</sub> ) | J <sub>2y</sub> 1  | 7.99                             | 337.89    | 191.70                        | 55.42                         | 6.90            | 35.93                           | 34.90            | 11.67            | 0.93                         |
|                                                                      | J <sub>2y</sub> 2  | 7.75                             | 328.14    | 216.31                        | 29.43                         | 3.84            | 28.93                           | 36.88            | 12.37            | 0.00                         |
|                                                                      | J <sub>2y</sub> 3  | 7.87                             | 264.90    | 82.65                         | 84.63                         | 17.69           | 46.36                           | 24.77            | 4.06             | 4.04                         |
|                                                                      | J <sub>2y</sub> 4  | 8.05                             | 612.34    | 316.12                        | 76.15                         | 41.35           | 168.41                          | 6.67             | 3.04             | 0.00                         |
|                                                                      | J <sub>2y</sub> 5  | 8.06                             | 275.17    | 158.60                        | 28.80                         | 12.40           | 23.60                           | 43.10            | 8.50             | 0.03                         |
|                                                                      | J <sub>2y</sub> 6  | 7.90                             | 274.08    | 182.53                        | 12.76                         | 3.00            | 12.75                           | 44.55            | 8.41             | 10.00                        |
|                                                                      | J <sub>2y</sub> 7  | 7.80                             | 269.21    | 181.07                        | 11.32                         | 3.93            | 11.94                           | 41.69            | 10.37            | 13.00                        |
|                                                                      | J <sub>2y</sub> 8  | 8.00                             | 179.25    | 103.69                        | 10.09                         | 0.55            | 33.65                           | 14.10            | 5.11             | 19.00                        |
|                                                                      | J <sub>2y</sub> 9  | 8.40                             | 1165.80   | 505.47                        | 93.02                         | 183.70          | 351.13                          | 6.82             | 4.42             | 15.00                        |
|                                                                      | J <sub>2y</sub> 10 | 8.30                             | 963.90    | 484.27                        | 66.27                         | 91.26           | 285.94                          | 6.01             | 1.21             | 22.00                        |
|                                                                      | J <sub>2y</sub> 11 | 7.50                             | 4324.95   | 283.46                        | 356.03                        | 2101.94         | 1267.67                         | 299.96           | 15.31            | 16.00                        |
|                                                                      | J <sub>2y</sub> 12 | 8.40                             | 1252.11   | 593.87                        | 70.79                         | 199.00          | 376.58                          | 7.18             | 1.98             | 20.90                        |
|                                                                      | J <sub>2y</sub> 13 | 7.30                             | 15,283.78 | 51.84                         | 1188.70                       | 8350.40         | 4010.69                         | 1592.18          | 88.33            | 20.00                        |
| Surface water (S)                                                    | S1                 | 8.24                             | 345.21    | 223.65                        | 23.54                         | 7.54            | 12.59                           | 58.70            | 10.83            | 6.30                         |
|                                                                      | S2                 | 8.20                             | 356.44    | 200.65                        | 48.11                         | 12.29           | 22.50                           | 57.91            | 8.88             | 5.71                         |
|                                                                      | S3                 | 7.79                             | 1058.81   | 447.78                        | 270.40                        | 32.69           | 239.85                          | 48.56            | 12.31            | 7.12                         |
| Gushing water (G)                                                    | G1                 | 7.19                             | 1832.23   | 910.25                        | 371.06                        | 32.78           | 446.54                          | 56.76            | 11.08            | 0.00                         |
|                                                                      | G2                 | 7.82                             | 502.63    | 249.58                        | 104.80                        | 9.42            | 91.17                           | 32.18            | 11.34            | 3.68                         |
|                                                                      | G3                 | 7.07                             | 2693.39   | 1152.98                       | 712.20                        | 47.92           | 686.04                          | 72.24            | 13.28            | 0.00                         |
|                                                                      | G4                 | 7.20                             | 876.19    | 533.42                        | 98.76                         | 11.04           | 189.19                          | 35.39            | 6.65             | 0.00                         |
|                                                                      | G5                 | 6.14                             | 1704.04   | 172.26                        | 1049.92                       | 22.64           | 99.48                           | 235.24           | 90.92            | 0.00                         |
|                                                                      | G6                 | 7.80                             | 512.98    | 243.64                        | 117.30                        | 20.39           | 42.60                           | 65.09            | 23.29            | 0.60                         |
